# Supplementary material for: Investigating the reactivity and cellular interactions of indazole-based ruthenium(ii) complexes in cancer and leishmania cells
Source: Royal Society of Chemistry journal article supplement (doi:10.1039/d4nj03319a), 2024-01-01
Supplement: d4nj03319a1.pdf [file d4nj03319a1.pdf]

## Supporting Information

### Investigating the reactivity and cellular interactions of indazole-based ruthenium(II) complexes in cancer and leishmania cells

Danilo Kleber Santos Sales,<sup>\*a</sup> Gabriela Cruz Fernandes,<sup>b</sup> Carlos Daniel Silva da Silva,<sup>b</sup> Isabela Santos Cezar,<sup>c</sup> Dahara Keyse Carvalho Silva,<sup>d</sup> Milena Botelho Pereira Soares,<sup>d,e</sup> Cássio Santana Meira<sup>c,d,e</sup>, Eduardo Henrique Silva de Sousa<sup>f</sup>; Luiz Gonzaga de França Lopes<sup>f</sup> and Denise Santos de Sá<sup>c</sup>

<sup>a</sup> Department of Engineering, Jorge Amado University Center, Salvador, Bahia, Brazil.

<sup>b</sup> Department of Chemistry, Federal Institute of Bahia, Salvador, Bahia, Brazil.

<sup>c</sup> Department of Life Sciences, State University of Bahia, Salvador, Bahia, Brazil.

<sup>d</sup> Gonçalo Moniz Institute, Oswaldo Cruz Foundation, FIOCRUZ, Salvador, Bahia, Brazil.

<sup>e</sup> Institute of Innovation in Advanced Health Systems (ISI SAS), University Center SENAI/CIMATEC, Salvador, Bahia, Brazil.

<sup>f</sup> Departamento de Química Orgânica e Inorgânica, Universidade Federal do Ceará, Fortaleza, Ceará, Brazil.

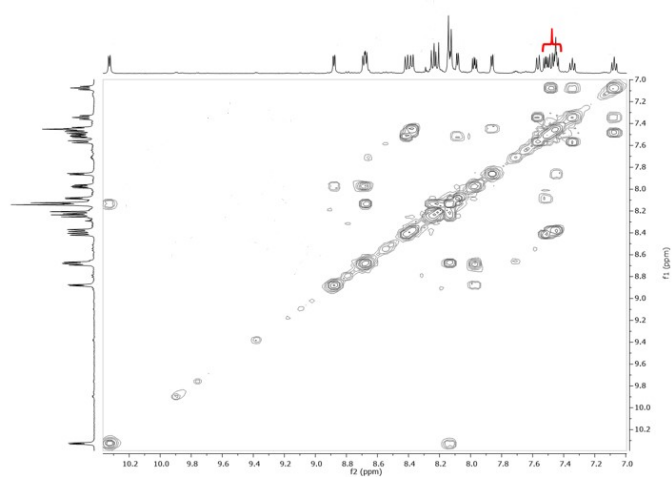

**Fig. S1**  $^1\text{H}$  NMR bidimensional spectrum (COSY) of FOR022 and 25 °C, deuterated methanol.

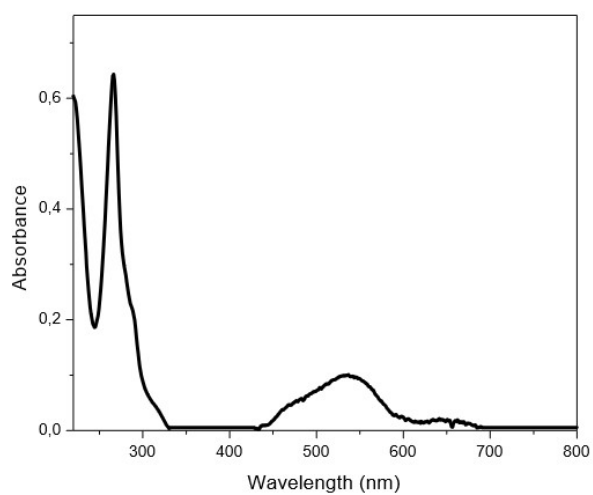

**Fig. S2** Electronic absorption spectra of metal complex *cis*-[RuCl<sub>2</sub>(phen)<sub>2</sub>] (FOR020 - precursor) in acetonitrile.

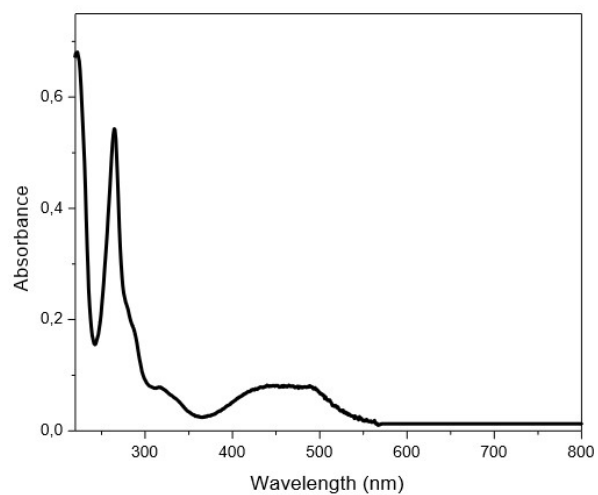

**Fig. S3** Electronic absorption spectra of metal complex *cis*-[RuCl(Hind)(phen)<sub>2</sub>]PF<sub>6</sub> (FOR022) in acetonitrile.

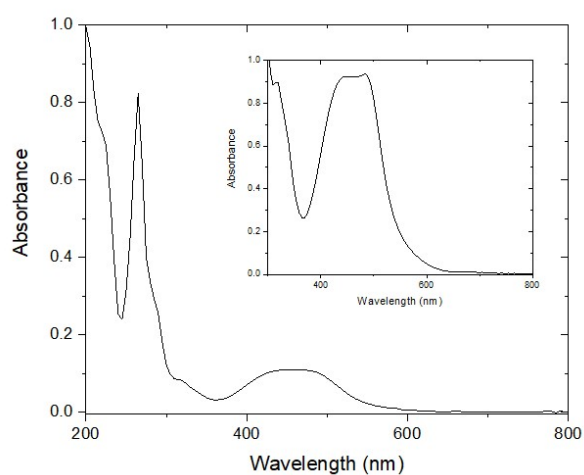

**Fig. S4** Electronic absorption spectra of metal complex *cis*-[Ru(Hind)<sub>2</sub>(phen)<sub>2</sub>](PF<sub>6</sub>)<sub>2</sub> (FOR0E2), in acetonitrile.

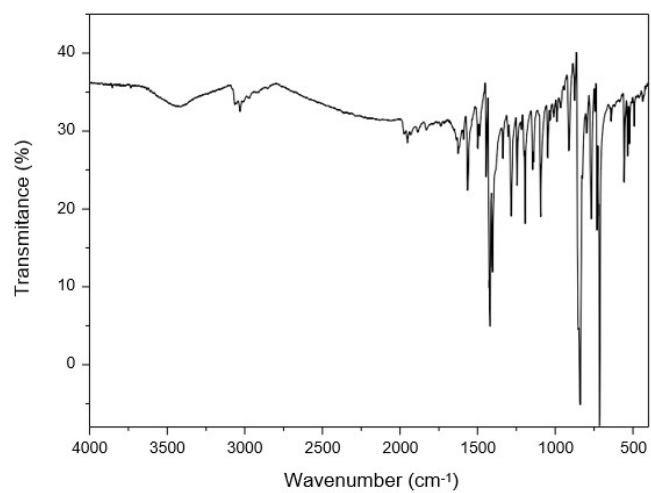

**Fig. S5** infrared spectra of metal complex *cis*-[RuCl<sub>2</sub>(phen)<sub>2</sub>] (FOR020 - precursor) in KBr pellet.

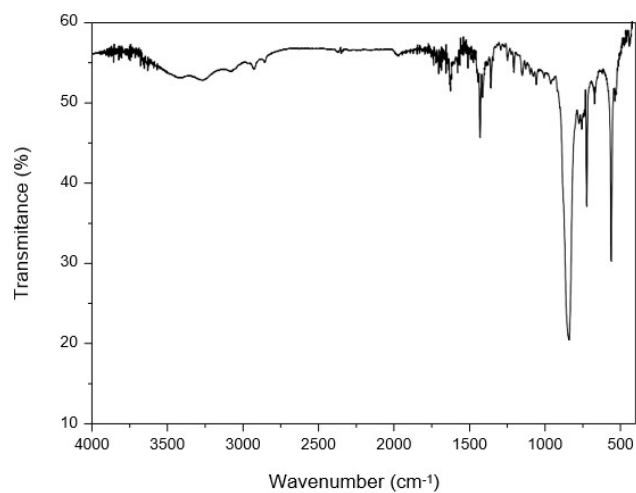

**Fig. S6** infrared spectra of metal complex *cis*-[RuCl(Hind)(phen)<sub>2</sub>]PF<sub>6</sub> (FOR022) in KBr pellet.

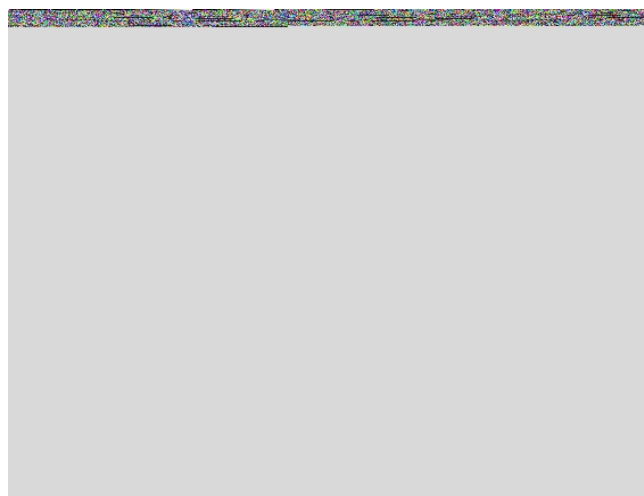

**Fig. S7** infrared spectra of metal complex *cis*-[Ru(Hind)<sub>2</sub>(phen)<sub>2</sub>](PF<sub>6</sub>)<sub>2</sub> (FOR0E2) in KBr pellet.

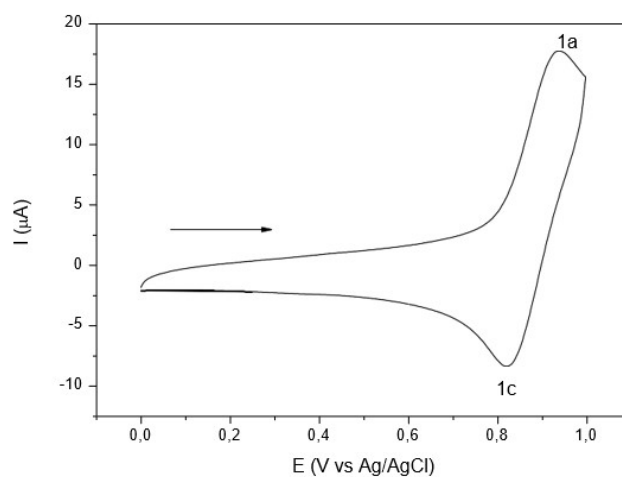

**Fig. S8** Cyclic voltammogram of metal complex *cis*-[RuCl(Hind)(phen)<sub>2</sub>]PF<sub>6</sub> (FOR022) (940 μmol L<sup>-1</sup>) at 25 mV s<sup>-1</sup> in acetonitrile containing 0.1 mol L<sup>-1</sup> tetrabutylammonium perchlorate (PTBA). Ferrocene as internal standard, Fc/Fc<sup>+</sup> at E<sub>1/2</sub> = 0.52 V vs. Ag/AgCl - Supplementary data Fig. S10.

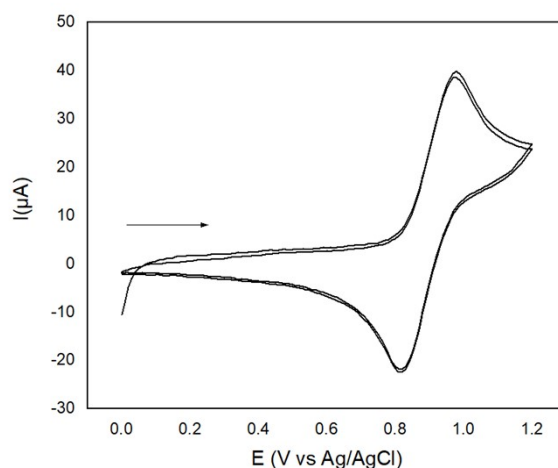

**Fig. S9** Cyclic voltammogram metal complex *cis*-[Ru(Hind)<sub>2</sub>(phen)<sub>2</sub>](PF<sub>6</sub>)<sub>2</sub> (FOR0E2) (940 μmol L<sup>-1</sup>) at 25 mV s<sup>-1</sup> in acetonitrile containing 0.1 mol L<sup>-1</sup> tetrabutylammonium perchlorate (PTBA). Ferrocene as internal standard, Fc/Fc<sup>+</sup> at E<sub>1/2</sub> = 0.52 V vs. Ag/AgCl - Supplementary data Fig. S10.

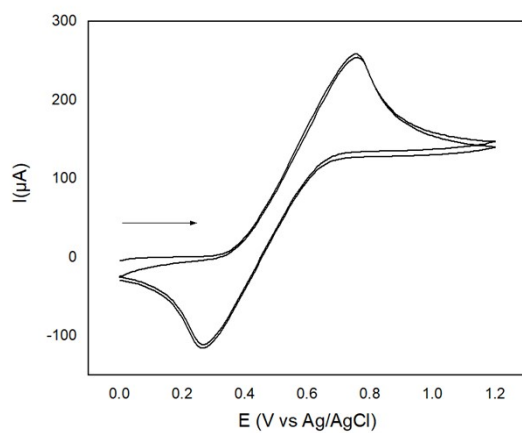

**Fig. S10** Cyclic voltammogram of internal standard ferrocene (Fc) in acetonitrile/tetrabutylammonium perchlorate (PTBA). Rate scan: 25 mV s<sup>-1</sup>.

**Table S1** Electrochemical potentials of metal complexes *cis*-[RuCl<sub>2</sub>(phen)<sub>2</sub>] (FOR020 - precursor), *cis*-[RuCl(Hind)(phen)<sub>2</sub>]PF<sub>6</sub> (FOR022) and *cis*-[Ru(Hind)<sub>2</sub>(phen)<sub>2</sub>](PF<sub>6</sub>)<sub>2</sub> (FOR0E2) in MeCN/PTBA (vs Ag/AgCl).

| Compounds | Electrochemical potential (E <sub>1/2</sub> ) (V) | Experimental λ <sub>max</sub> (nm) in visible range |
|-----------|---------------------------------------------------|-----------------------------------------------------|
|           | 1a/1c                                             |                                                     |
|           |                                                   |                                                     |

|        |      |     |
|--------|------|-----|
| FOR020 | 0.47 | 542 |
| FOR022 | 0.89 | 462 |
| FOR0E2 | 0.87 | 450 |
